# Supplementary material for: The Aspergillus nidulans Kinesin-3 Tail Is Necessary and Sufficient to Recognize Modified Microtubules
Source: PubMed Central journal article supplement (PMC3282709; doi:10.1371/journal.pone.0030976), 2012-02-20

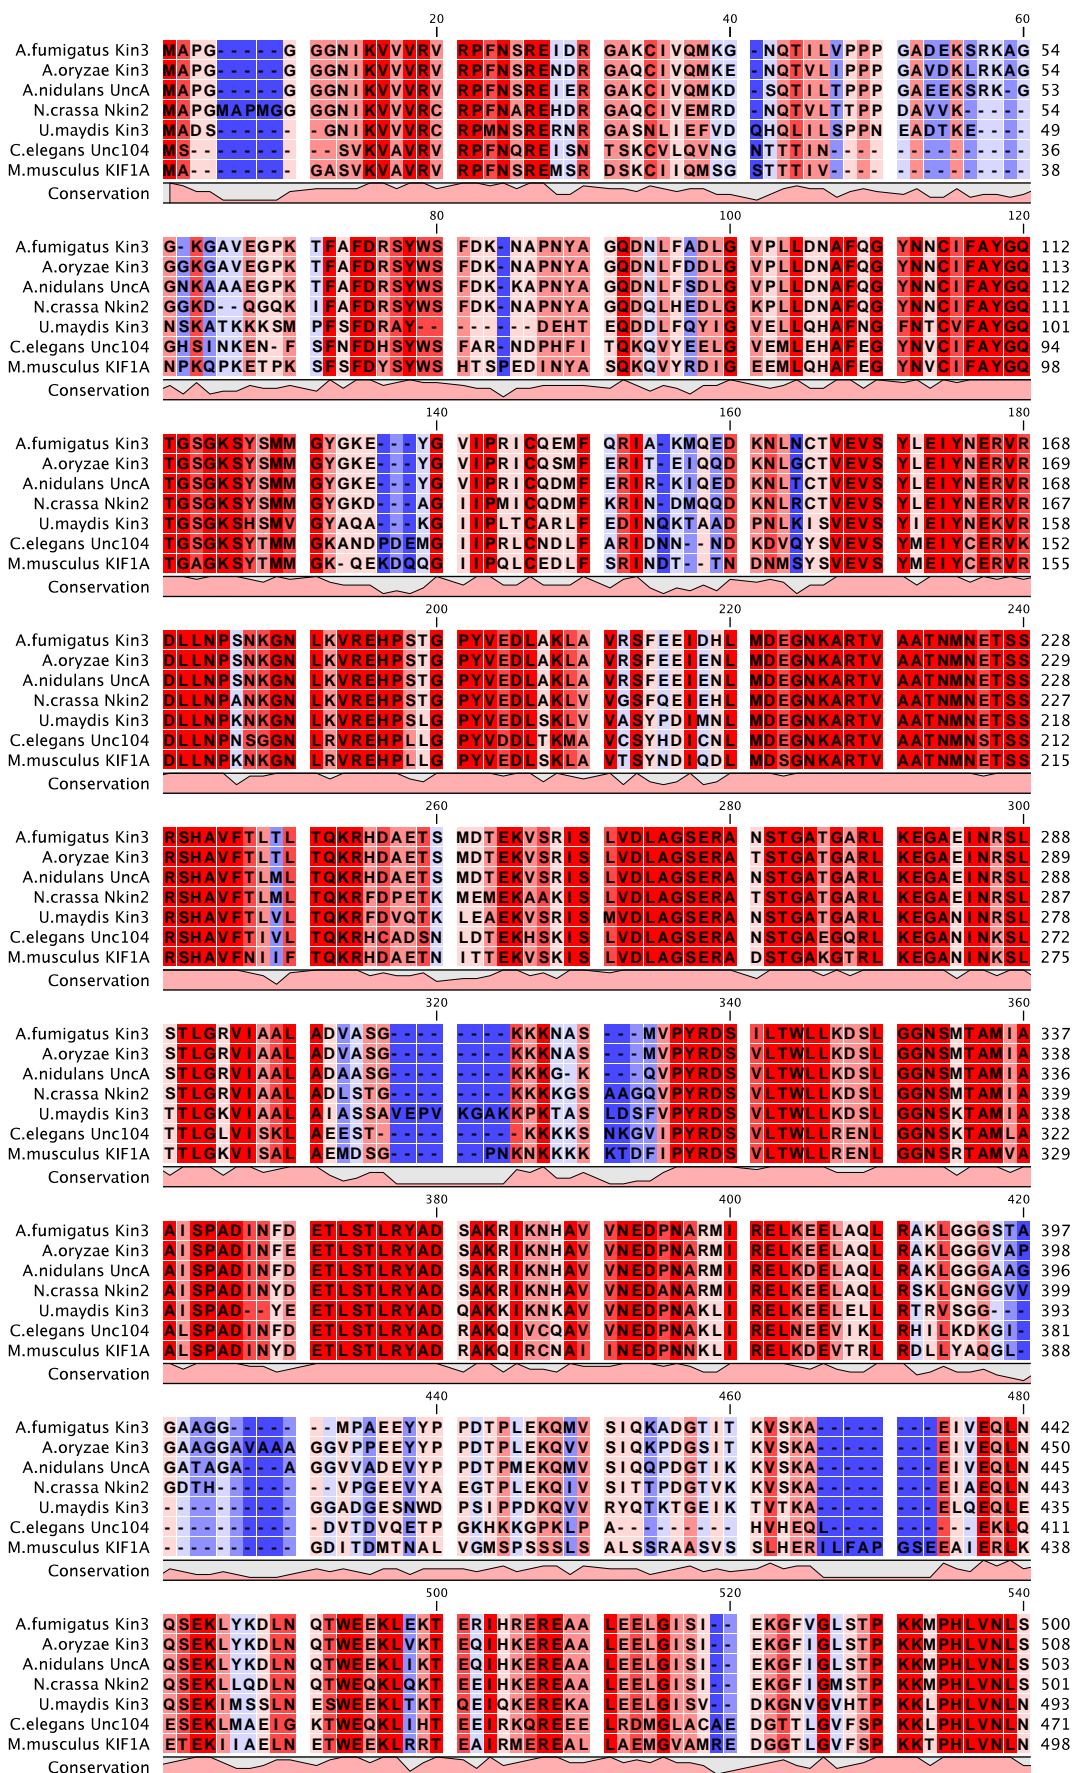

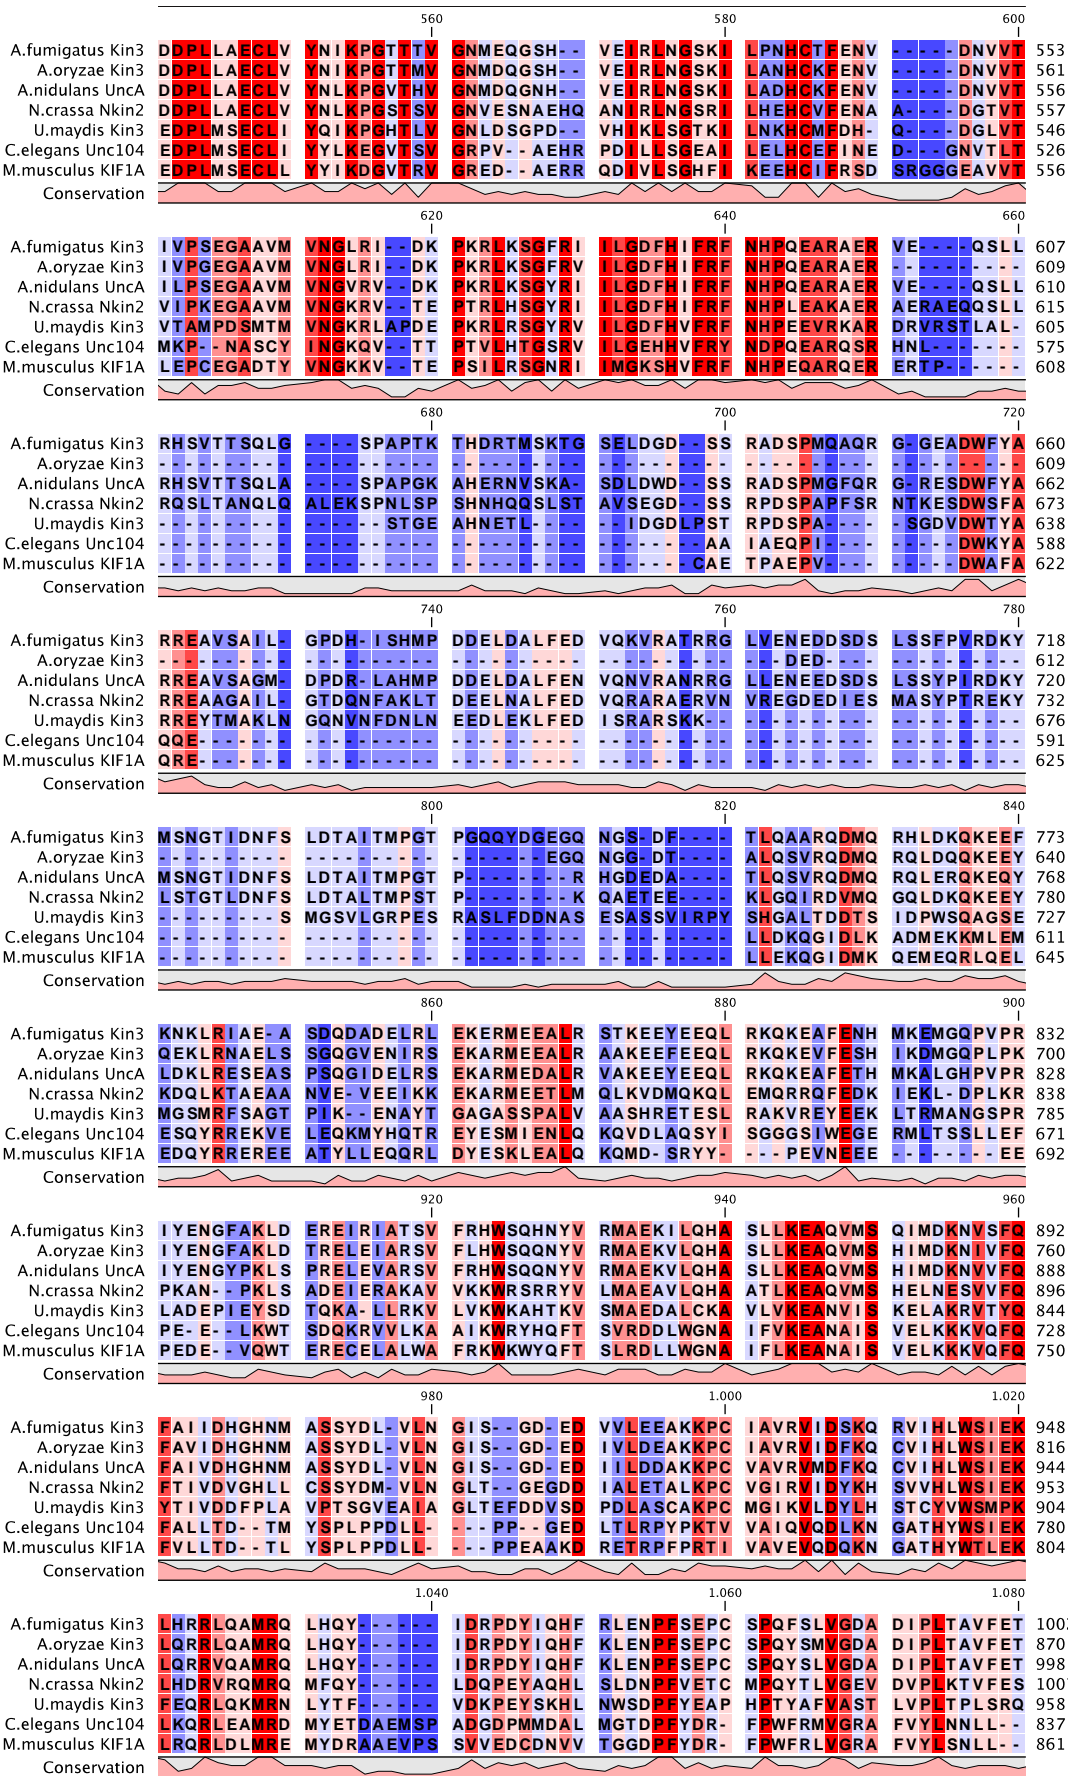

Supplement: pone.0030976.s001.pdf [file pone.0030976.s001.pdf]
